# Supplementary material for: A crystalline covalent organic framework embedded with a crystalline supramolecular organic framework for efficient iodine capture
Source: Royal Society of Chemistry journal article supplement (doi:10.1039/d1ta03879f), 2021-01-01
Supplement: d1ta03879f1.pdf [file d1ta03879f1.pdf]

Electronic Supplementary Information

## **Crystalline covalent organic frameworks embedded with crystalline supramolecular organic framework for efficient iodine capture**

Yao Zhu,<sup>‡a</sup> Yue Qi,<sup>‡b</sup> Xinhua Guo,<sup>b</sup> Meicheng Zhang,<sup>b</sup> Zhimin Jia,<sup>b</sup> Chuanqin Xia,<sup>b</sup> Ning Liu,<sup>d</sup>  
Chiyao Bai,<sup>\*c</sup> Lijian Ma,<sup>\*b</sup> Qin Wang<sup>\*a</sup>

<sup>a</sup> Key Laboratory of Medical Electrophysiology, Ministry of Education, School of Pharmacy, Southwest Medical University, Luzhou 646000, China. E-mail: wq\_ring@hotmail.com

<sup>b</sup> College of Chemistry, Sichuan University, Key Laboratory of Radiation Physics & Technology, Ministry of Education, No. 29 Wangjiang Road, Chengdu, 610064, P. R. China. E-mail: ma.lj@hotmail.com

<sup>c</sup> Chengdu New Radiomedicine Technology CO. LTD., Chengdu, 610064, P. R. China. E-mail: baichiyao@outlook.com

<sup>d</sup> Institute of Nuclear Science and Technology, Sichuan University, Key Laboratory of Radiation Physics & Technology, Ministry of Education, No. 29 Wangjiang Road, Chengdu, 610064, P. R. China

<sup>‡</sup> (Y. Zhu, Y. Qi) These authors contributed equally to this work.

## Content

|                                                                                                                                                                                     |        |
|-------------------------------------------------------------------------------------------------------------------------------------------------------------------------------------|--------|
| <b>Section S1.</b> Regents.....                                                                                                                                                     | - 2 -  |
| <b>Section S2.</b> Synthesis and characterization of BBI-3:.....                                                                                                                    | - 2 -  |
| <b>Section S3.</b> General procedures for volatile iodine uptake and release .....                                                                                                  | - 4 -  |
| <b>Table S1.</b> Single crystal diffraction conditions and cell data of BBI-3•CHCl <sub>3</sub> .....                                                                               | - 6 -  |
| <b>Fig. S1</b> Experimental and simulated PXRD patterns of Bm-SOF. ....                                                                                                             | - 7 -  |
| <b>Fig. S2</b> TG analysis of Bm-SOF, BTM and TPT-DHBD COF.....                                                                                                                     | - 7 -  |
| <b>Fig. S4</b> XPS survey spectra of Bm-SOF and BTM.....                                                                                                                            | - 8 -  |
| <b>Fig. S7</b> <sup>1</sup> H NMR of <b>b</b> . ....                                                                                                                                | - 9 -  |
| <b>Fig. S8</b> <sup>1</sup> H NMR of BBI-3. ....                                                                                                                                    | - 10 - |
| <b>Fig. S9</b> <sup>13</sup> C NMR of BBI-3. ....                                                                                                                                   | - 10 - |
| <b>Fig. S10</b> PXRD spectra of BTM, TPT-DHBD COF and BTM.....                                                                                                                      | - 11 - |
| <b>Table S2.</b> Fractional Atomic Coordinates ( $\times 10^4$ ) and Equivalent Isotropic Displacement Parameters ( $\text{\AA}^2 \times 10^3$ ) for BBI-3•CHCl <sub>3</sub> . .... | - 12 - |
| <b>Table S3.</b> Anisotropic Displacement Parameters ( $\text{\AA}^2 \times 10^3$ ) for BBI-3•CHCl <sub>3</sub> . ....                                                              | - 13 - |
| <b>Table S4.</b> Bond Lengths for BBI-3•CHCl <sub>3</sub> .....                                                                                                                     | - 14 - |
| <b>Table S5.</b> Bond Angles for BBI-3•CHCl <sub>3</sub> .....                                                                                                                      | - 15 - |
| <b>Table S6.</b> Hydrogen Atom Coordinates ( $\text{\AA} \times 10^4$ ) and Isotropic Displacement Parameters ( $\text{\AA}^2 \times 10^3$ ) for BBI-3•CHCl <sub>3</sub> . ....     | - 16 - |
| <b>Table S7.</b> Summary of the reported adsorption capacity of iodine adsorbents .....                                                                                             | - 17 - |
| <b>References:</b> .....                                                                                                                                                            | - 17 - |

## Section S1. Regents

Salicylaldehyde, Cyanuric chloride, *p*-hydroxy benzaldehyde, 3, 3'- dihydroxy benzidine and ice acetic acid, mesitylene, dioxane, acetone, tetrahydrofuran, N, N - dimethyl formamide, ethanol, phosphorus tribromide, *o*-phenyldiamine, ethyl acetate, petroleum ether, chloroform, sodium bicarbonate, anhydrous potassium carbonate, anhydrous sodium sulfate, sodium hydroxide, deuterium dimethyl sulfoxide, acetonitrile, etc., are purchased by business and can be used without further purification.

## Section S2. Synthesis and characterization of BBI-3:

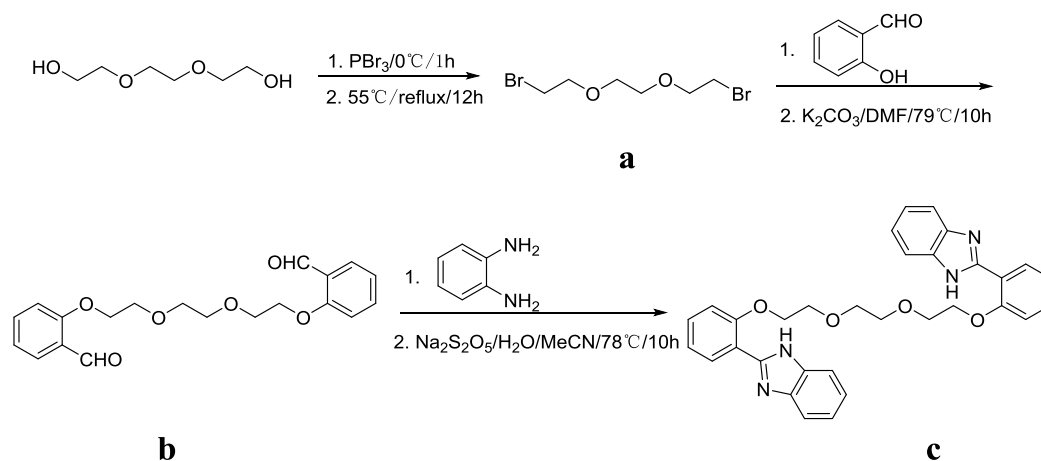

### 1. Synthesis of **a**:

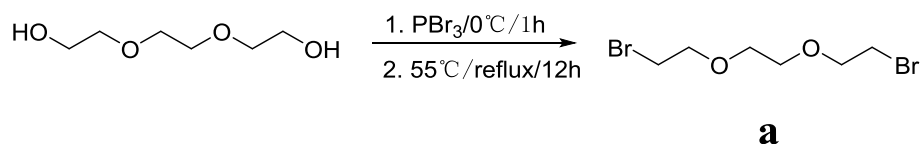

To a solution of triethylene glycol (24.02 g, 226.20 mmol) in  $\text{CHCl}_3$  (90 mL) was added  $\text{PBr}_3$  (40.82 g, 150.80 mmol) in 20 mL  $\text{CHCl}_3$  dropwise at  $0^\circ\text{C}$  for 1 h and then refluxed at  $55^\circ\text{C}$  for 12 h. After the complete consumption of the starting material, the mixture was left to cool to room temperature and a orange paste liquid was obtained.

The reaction mixture was quenched with 40 mL of water, extracted with CHCl<sub>3</sub> (20 mL × 3). The combined organic phase was washed with saturated NaHCO<sub>3</sub> solution (10 mL), dried over Na<sub>2</sub>SO<sub>4</sub>, filtered and concentrated under reduced pressure. Flash chromatography of the residue through silica gel (petroleum ether: ethyl acetate = 10:1) gave **a** as a white solid (yield: 53.17%).

## 2. Synthesis of **b**:

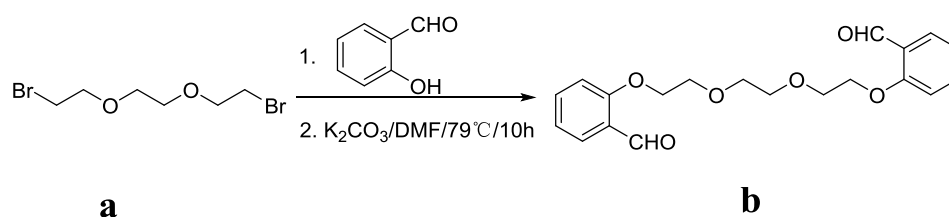

To a solution of K<sub>2</sub>CO<sub>3</sub> (8.33 g, 60.20 mmol) and **a** (9.30 g, 40.20 mmol) in DMF (90 mL) was added salicylaldehyde (9.44 mL, 90.45 mL) in 20 mL DMF dropwise at 79°C for 10 h. After the complete consumption of the starting material, the mixture was left to cool to room temperature and a turgid orange liquid was obtained. The turgid orange liquid was quenched with 40 mL of 10% NaOH aqueous solution, extracted with CHCl<sub>3</sub> (20 mL × 3). The combined organic phase was washed with brine (20 mL), dried over Na<sub>2</sub>SO<sub>4</sub>, filtered and concentrated under reduced pressure. Flash chromatography of the residue through silica gel (petroleum ether: ethyl acetate = 10:1, 3:1, 1:1) gave **b** as a white solid (yield: 87.30%). <sup>1</sup>H NMR (400 MHz, CDCl<sub>3</sub>) δ 10.47 (dd, *J* = 1.6, 0.9 Hz, 1H), 7.80 – 7.72 (m, 1H), 7.52 – 7.43 (m, 1H), 7.00 – 6.91 (m, 1H), 4.19 (dt, *J* = 16.9, 8.6 Hz, 1H), 3.87 (dd, *J* = 3.2, 1.3 Hz, 1H), 3.71 (s, *J* = 2.2 Hz, 1H).

## 3. Synthesis of **c** (BBI-3):

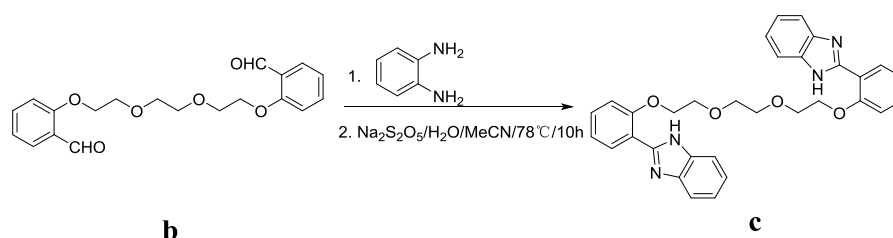

To a solution of  $\text{Na}_2\text{S}_2\text{O}_5$  (3.39 g, 17.85 mmol) in 5 mL  $\text{H}_2\text{O}$  was added *o*-phenylenediamine (3.72 g, 34.39 mmol) in MeCN (10 mL) dropwise at  $55^\circ\text{C}$  for stirring 30 min. Then a solution of **b** (3.75 g, 11.90 mmol) in MeCN (30 mL) was added within 1 h, allowed the reaction mixture stirred and refluxed at  $78^\circ\text{C}$  for 10 h. After the complete consumption of the starting material, the mixture was left to cool to room temperature and a orange yellow liquid was obtained. The reaction mixture was quenched with 40 mL of water, extracted with  $\text{CHCl}_3$  (10 mL  $\times$  3). The combined organic phase was washed with saturated  $\text{NaHCO}_3$  solution (10 mL), dried over  $\text{Na}_2\text{SO}_4$ , filtered and concentrated under reduced pressure. Flash chromatography of the residue through silica gel (petroleum ether: ethyl acetate = 3:1, 1:1, 1:3) gave **c** as a light yellow solid (yield: 27.23%).  $^1\text{H}$  NMR (400 MHz,  $\text{CDCl}_3$ )  $\delta$  11.08 (s, 1H), 8.39 (dd,  $J = 7.8, 1.6$  Hz, 1H), 7.87 – 7.31 (m, 2H), 7.25 (dd,  $J = 7.7, 6.2$  Hz, 1H), 7.21 (s, 2H), 7.09 (t,  $J = 7.6$  Hz, 1H), 6.78 – 6.54 (m, 1H), 4.06 (d,  $J = 2.1$  Hz, 2H), 3.96 (t,  $J = 6.9$  Hz, 2H), 3.93 (dd,  $J = 3.9, 1.9$  Hz, 2H).  $^{13}\text{C}$  NMR (101 MHz,  $\text{CDCl}_3$ )  $\delta$  155.63 (s), 149.82 (s), 130.94 (s), 130.09 (s), 122.17 (s,  $J = 19.2$  Hz), 118.51 (s), 112.72 (s), 77.53 – 76.99 (m), 76.99 – 76.85 (m), 76.70 (s), 70.57 (s), 69.42 (s), 67.12 (s).

### Section S3. General procedures for volatile iodine uptake and release

#### 3.1. Iodine uptake: iodine uptake experiments based on gravimetric measurements

were performed in the following procedure. 10 mg of adsorbent in an open glass Pyrex Beaker (2 mL) and 500 mg of iodine solids were placed in a sealed glass vial (50 mL) and heated at 75 °C and 1.0 bar using an oven. After adsorption of the iodine vapor for a while (0-48 h), the adsorbed polymer powders were cooled down to room temperature and weighed. The iodine uptake capacities for adsorbent was calculated by weight gains:

$$C_u = (W_2 - W_1) / W_1 \times 100 \text{ wt}\%$$

$C_u$  is the iodine uptake capacity and  $W_1$ ,  $W_2$  are the mass weight of TPT-DHBDX COFs before and after adsorbed iodine vapor.

3.2. Iodine release: Iodine release and adsorbent recycle upon heating were conducted as follows: Iodine-equilibrium adsorbent was charged in an open glass Pyrex Beaker (2 mL) in an open glass vial (50 mL) and heated at 125 °C and 1.0 bar in an oil bath. The iodine release efficiency was calculated by weight gains:

$$E_r = (W_x - W_t) / W_x \times 100 \text{ wt}\%$$

$E_r$  is the iodine release efficiency and  $W_t$  is the mass weight of iodine-equilibrium adsorbent after heating release (0-420 min).  $W_x$  is the iodine mass weight of adsorbent.

**Table S1.** Single crystal diffraction conditions and cell data of BBI-3•CHCl<sub>3</sub>

|                                             |                                                                               |
|---------------------------------------------|-------------------------------------------------------------------------------|
| Empirical formula                           | C <sub>17</sub> H <sub>16</sub> Cl <sub>3</sub> N <sub>2</sub> O <sub>2</sub> |
| Formula weight                              | 386.67                                                                        |
| Temperature/K                               | 135.00(10)                                                                    |
| Crystal system                              | cubic                                                                         |
| Space group                                 | Ia-3d                                                                         |
| a/Å                                         | 35.7725(6)                                                                    |
| b/Å                                         | 35.7725(6)                                                                    |
| c/Å                                         | 35.7725(6)                                                                    |
| α/°                                         | 90.00                                                                         |
| β/°                                         | 90.00                                                                         |
| γ/°                                         | 90.00                                                                         |
| Volume/Å <sup>3</sup>                       | 45776.9(13)                                                                   |
| Z                                           | 96                                                                            |
| ρ <sub>calc</sub> /mg/mm <sup>3</sup>       | 1.347                                                                         |
| m/mm <sup>-1</sup>                          | 0.492                                                                         |
| F(000)                                      | 19104.0                                                                       |
| Crystal size/mm <sup>3</sup>                | 0.32 × 0.29 × 0.25                                                            |
| 2θ range for data collection                | 5.8 to 49.98 °                                                                |
| Index ranges                                | -39 ≤ h ≤ 13, -31 ≤ k ≤ 26, -20 ≤ l ≤ 42                                      |
| Reflections collected                       | 18217                                                                         |
| Independent reflections                     | 3357[R(int) = 0.0796]                                                         |
| Data/restraints/parameters                  | 3357/0/225                                                                    |
| Goodness-of-fit on F <sup>2</sup>           | 1.032                                                                         |
| Final R indexes [I ≥ 2σ (I)]                | R <sub>1</sub> = 0.0847, wR <sub>2</sub> = 0.2180                             |
| Final R indexes [all data]                  | R <sub>1</sub> = 0.1618, wR <sub>2</sub> = 0.2635                             |
| Largest diff. peak/hole / e Å <sup>-3</sup> | 0.48/-0.29                                                                    |

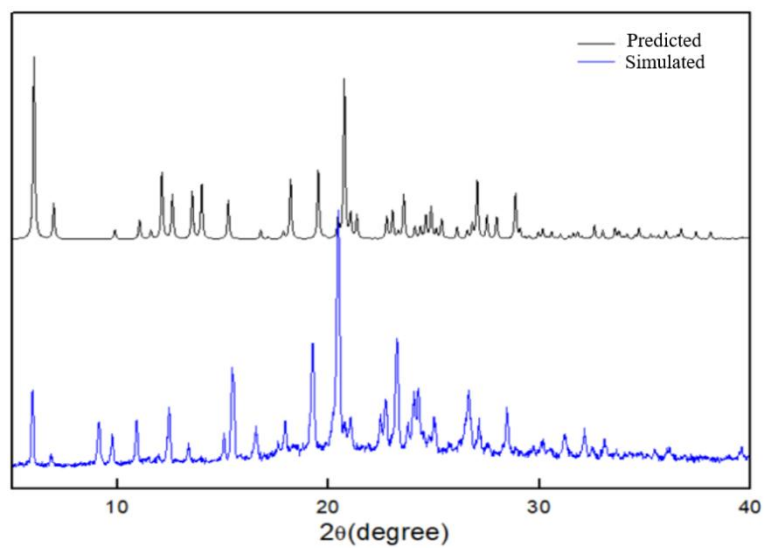

**Fig. S1** Experimental and simulated PXR D patterns of Bm-SOF.

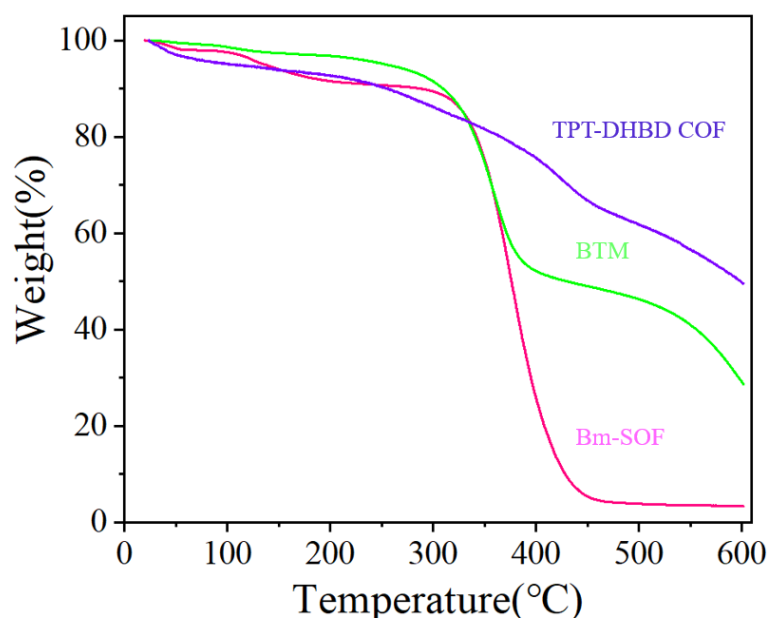

**Fig. S2** TG analysis of Bm-SOF, BTM and TPT-DHBD COF.



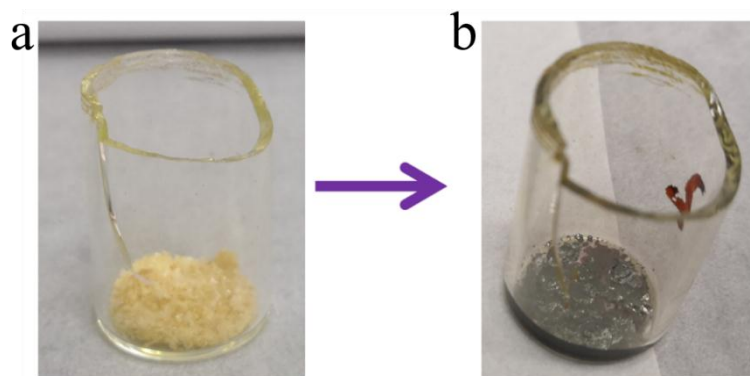

**Fig. S3** Picture of Bm-SOF (a) and Bm-SOF@I<sub>2</sub> (b).

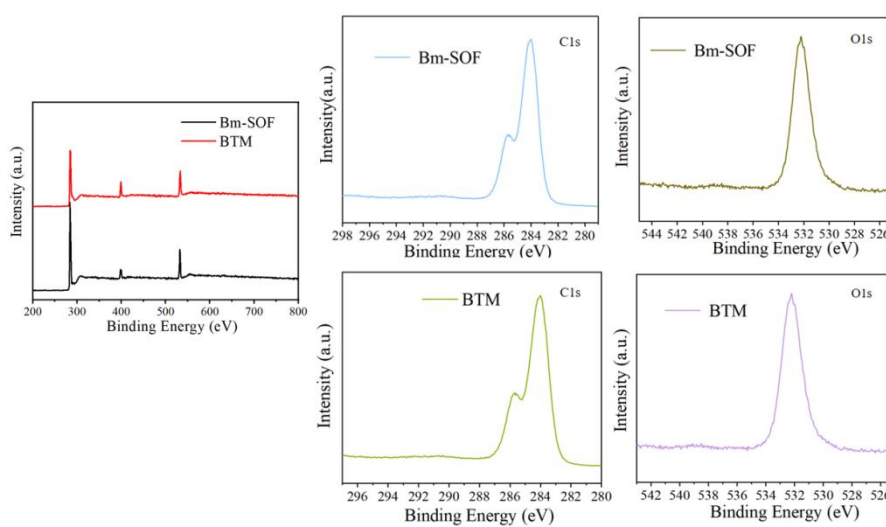

**Fig. S4** XPS survey spectra of Bm-SOF and BTM.

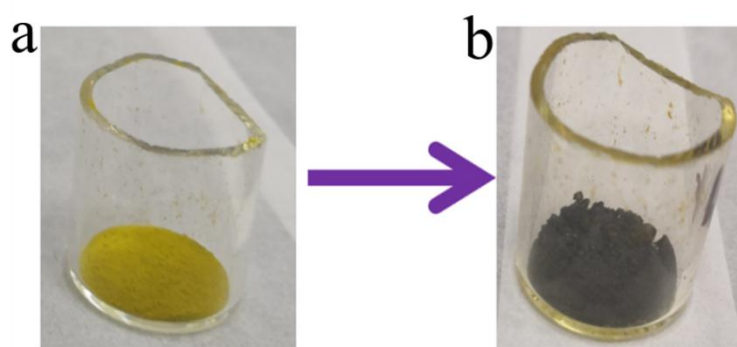

**Fig. S5** Picture of BTM (a) and BTM@I<sub>2</sub> (b).

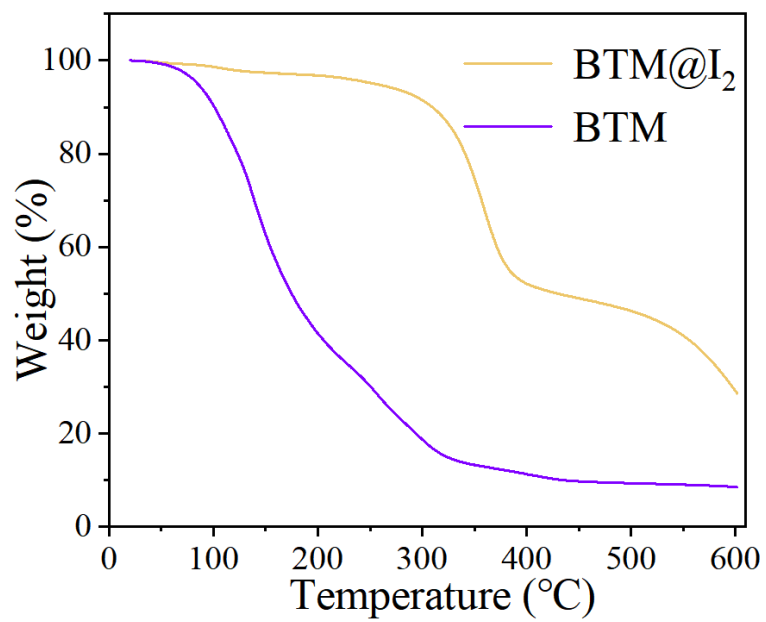

**Fig. S6** TG analysis of BTM and BTM@I<sub>2</sub>.

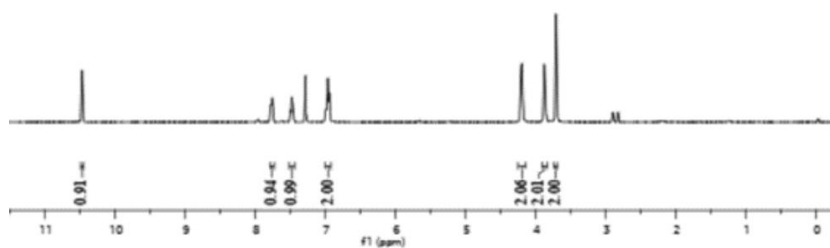

**Fig. S7** <sup>1</sup>H NMR of **b**.

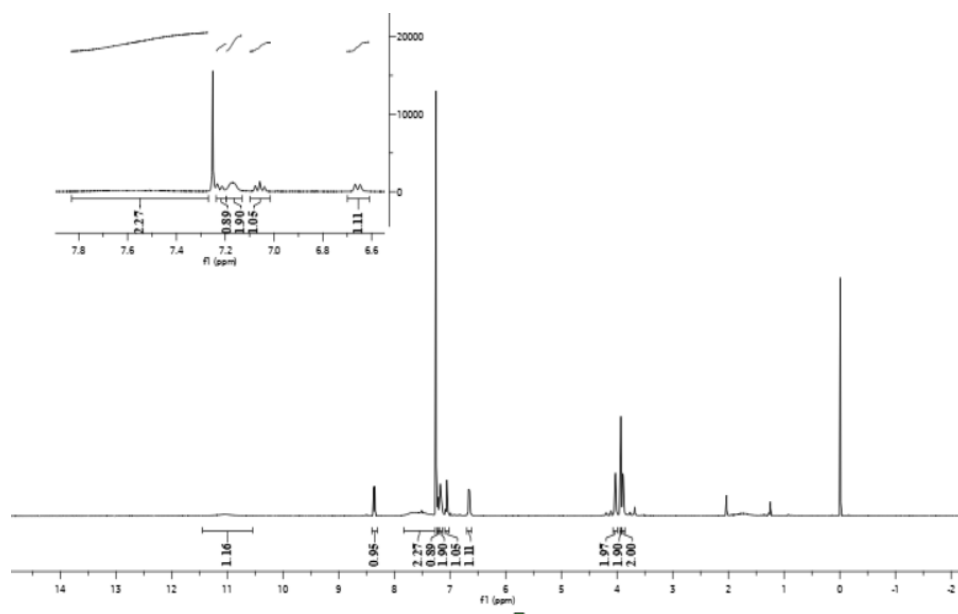

Fig. S8  $^1\text{H}$  NMR of BBI-3.

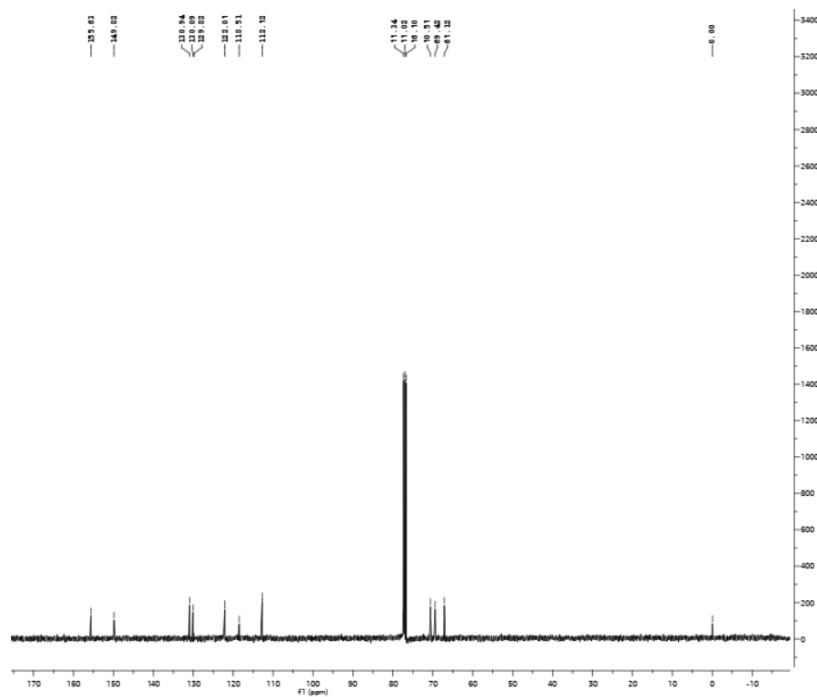

Fig. S9  $^{13}\text{C}$  NMR of BBI-3.

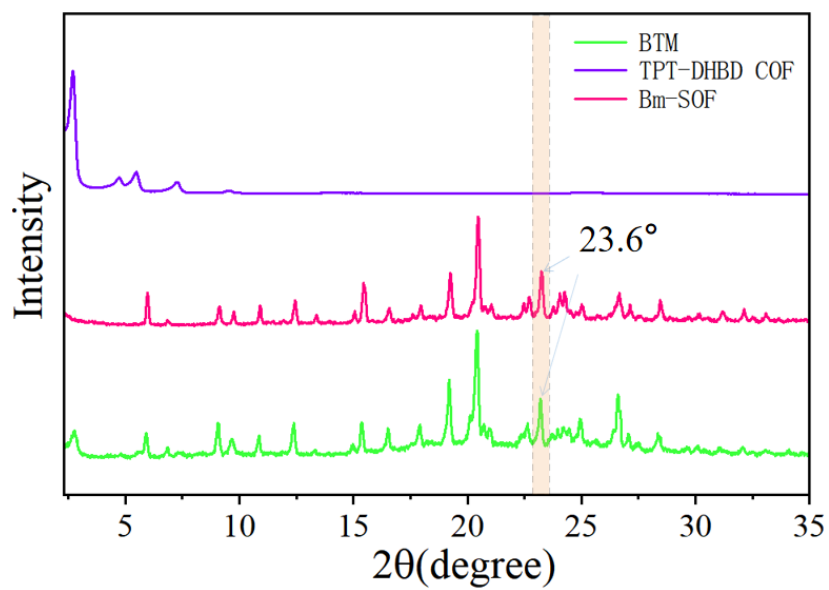

**Fig. S10** PXRD spectra of BTM, TPT-DHBD COF and BTM.

**Table S2.** Fractional Atomic Coordinates ( $\times 10^4$ ) and Equivalent Isotropic Displacement Parameters ( $\text{\AA}^2 \times 10^3$ ) for BBI-3 $\cdot$ CHCl<sub>3</sub>.

| Atom | <i>x</i>   | <i>y</i>   | <i>z</i>   | U(eq)    |
|------|------------|------------|------------|----------|
| Cl1  | 8688.0(5)  | 5105.1(5)  | 353.0(5)   | 73.1(6)  |
| Cl2  | 8919.3(6)  | 4346.4(6)  | 212.4(5)   | 87.4(7)  |
| Cl3  | 8139.3(5)  | 4514.3(5)  | 346.2(5)   | 76.3(6)  |
| O1   | 6619.4(13) | 6431.7(15) | -540.2(15) | 94.5(18) |
| O2   | 7257(2)    | 6744(2)    | -265(3)    | 73(2)    |
| N1   | 6293.5(13) | 6800.2(13) | -9.4(13)   | 50.6(12) |
| N2   | 5725.8(13) | 6604.4(14) | 160.5(14)  | 56.1(13) |
| C1   | 6195.7(16) | 7020.9(17) | 288.1(16)  | 52.6(15) |
| C2   | 5842.5(17) | 6899.3(17) | 390.5(17)  | 56.9(16) |
| C3   | 5653.5(19) | 7066(2)    | 691.4(19)  | 71.0(19) |
| C4   | 5839.5(17) | 7351(2)    | 881.2(19)  | 67.6(19) |
| C5   | 6189.2(19) | 7469.8(19) | 765.6(19)  | 68.0(19) |
| C6   | 6373.2(17) | 7312.3(19) | 475.1(19)  | 65.2(18) |
| C7   | 6003.6(17) | 6554.7(17) | -73.5(18)  | 54.5(16) |
| C8   | 6012.5(17) | 6273.2(16) | -369.9(16) | 51.1(15) |
| C9   | 6319.7(18) | 6204.0(17) | -606.1(18) | 56.8(16) |
| C10  | 6298(2)    | 5943.9(19) | -886.3(19) | 68.1(19) |
| C11  | 5984(3)    | 5748.6(19) | -951(2)    | 81(2)    |
| C12  | 5679(2)    | 5804(2)    | -731(2)    | 95(2)    |
| C13  | 5692(2)    | 6063(2)    | -429(2)    | 76(2)    |
| C14  | 6967(2)    | 6364(2)    | -723(2)    | 80(2)    |
| C15  | 7215(3)    | 6710(3)    | -660(3)    | 62(3)    |
| C16  | 7460(3)    | 7081(2)    | -194(2)    | 100(3)   |
| C17  | 8562.7(19) | 4683.5(18) | 146.2(17)  | 65.0(18) |
| O2A  | 7113(6)    | 6881(5)    | -387(6)    | 73(2)    |
| C15A | 7246(6)    | 6538(7)    | -487(7)    | 62(3)    |

**Table S3.** Anisotropic Displacement Parameters ( $\text{\AA}^2 \times 10^3$ ) for BBI-3•CHCl<sub>3</sub>.

| Atom | U <sub>11</sub> | U <sub>22</sub> | U <sub>33</sub> | U <sub>23</sub> | U <sub>13</sub> | U <sub>12</sub> |
|------|-----------------|-----------------|-----------------|-----------------|-----------------|-----------------|
| Cl1  | 88.8(13)        | 71.8(12)        | 58.9(10)        | -8.2(9)         | -3.6(9)         | 4.9(9)          |
| Cl2  | 94.9(14)        | 89.4(14)        | 77.8(13)        | -13.3(10)       | 0.1(10)         | 32.9(11)        |
| Cl3  | 95.0(14)        | 69.3(12)        | 64.7(11)        | -2.8(9)         | 13.3(10)        | 4.2(10)         |
| O1   | 52(3)           | 115(4)          | 116(4)          | -51(3)          | 18(3)           | 6(3)            |
| O2   | 76(6)           | 47(5)           | 96(6)           | 21(4)           | 9(4)            | 0(4)            |
| N1   | 45(3)           | 59(3)           | 48(3)           | 2(2)            | 0(2)            | 5(2)            |
| N2   | 46(3)           | 64(3)           | 58(3)           | -9(3)           | 5(3)            | -5(3)           |
| C1   | 41(3)           | 66(4)           | 51(4)           | 5(3)            | -11(3)          | -3(3)           |
| C2   | 51(4)           | 60(4)           | 60(4)           | -2(3)           | -5(3)           | -8(3)           |
| C3   | 58(4)           | 78(5)           | 77(5)           | -17(4)          | 23(4)           | -13(4)          |
| C4   | 52(4)           | 87(5)           | 64(4)           | -29(4)          | 9(3)            | -6(4)           |
| C5   | 63(4)           | 77(5)           | 64(4)           | -13(4)          | -6(4)           | 2(4)            |
| C6   | 43(4)           | 79(5)           | 74(5)           | -12(4)          | -9(3)           | -8(3)           |
| C7   | 47(4)           | 58(4)           | 59(4)           | 6(3)            | -9(3)           | 2(3)            |
| C8   | 59(4)           | 54(4)           | 41(3)           | 3(3)            | 1(3)            | -4(3)           |
| C9   | 57(4)           | 57(4)           | 56(4)           | 2(3)            | -1(3)           | 2(3)            |
| C10  | 82(5)           | 64(4)           | 58(4)           | 5(4)            | 16(4)           | 20(4)           |
| C11  | 114(7)          | 55(4)           | 74(5)           | -6(4)           | 25(5)           | -14(4)          |
| C12  | 95(6)           | 91(6)           | 98(6)           | -14(5)          | 14(5)           | -35(5)          |
| C13  | 72(5)           | 86(5)           | 71(5)           | -20(4)          | 7(4)            | -20(4)          |
| C14  | 62(4)           | 80(5)           | 100(6)          | 3(4)            | 20(4)           | 23(4)           |
| C15  | 59(5)           | 54(6)           | 72(7)           | 29(5)           | 14(5)           | 9(5)            |
| C16  | 105(6)          | 92(6)           | 103(6)          | 9(4)            | 24(6)           | -25(5)          |
| C17  | 80(5)           | 70(4)           | 44(3)           | 5(3)            | 3(3)            | 9(4)            |
| O2A  | 76(6)           | 47(5)           | 96(6)           | 21(4)           | 9(4)            | 0(4)            |
| C15A | 59(5)           | 54(6)           | 72(7)           | 29(5)           | 14(5)           | 9(5)            |

**Table S4.** Bond Lengths for BBI-3•CHCl<sub>3</sub>

| Atom | Atom | Length/Å  | Atom | Atom             | Length/Å  |
|------|------|-----------|------|------------------|-----------|
| C11  | C17  | 1.739(7)  | C4   | C5               | 1.384(9)  |
| C12  | C17  | 1.771(7)  | C5   | C6               | 1.353(9)  |
| C13  | C17  | 1.781(7)  | C7   | C8               | 1.463(8)  |
| O1   | C9   | 1.367(8)  | C8   | C9               | 1.408(8)  |
| O1   | C14  | 1.426(8)  | C8   | C13              | 1.389(8)  |
| O2   | C15  | 1.427(15) | C9   | C10              | 1.370(9)  |
| O2   | C16  | 1.430(11) | C10  | C11              | 1.345(10) |
| N1   | C1   | 1.370(7)  | C11  | C12              | 1.360(10) |
| N1   | C7   | 1.378(7)  | C12  | C13              | 1.421(10) |
| N2   | C2   | 1.402(7)  | C14  | C15              | 1.539(13) |
| N2   | C7   | 1.311(7)  | C14  | C15A             | 1.45(3)   |
| C1   | C2   | 1.386(8)  | C16  | C16 <sup>1</sup> | 1.416(16) |
| C1   | C6   | 1.392(8)  | C16  | O2A              | 1.59(2)   |
| C2   | C3   | 1.404(8)  | O2A  | C15A             | 1.36(3)   |
| C3   | C4   | 1.394(9)  |      |                  |           |

**Table S5.** Bond Angles for BBI-3•CHCl<sub>3</sub>

| Atom | Atom | Atom | Angle/°  | Atom             | Atom | Atom | Angle/°   |
|------|------|------|----------|------------------|------|------|-----------|
| C9   | O1   | C14  | 120.3(6) | O1               | C9   | C8   | 113.8(5)  |
| C15  | O2   | C16  | 107.4(7) | O1               | C9   | C10  | 125.1(6)  |
| C1   | N1   | C7   | 107.7(5) | C10              | C9   | C8   | 121.0(6)  |
| C7   | N2   | C2   | 104.5(5) | C11              | C10  | C9   | 121.8(7)  |
| N1   | C1   | C2   | 104.9(5) | C10              | C11  | C12  | 119.6(7)  |
| N1   | C1   | C6   | 133.5(6) | C11              | C12  | C13  | 120.6(8)  |
| C2   | C1   | C6   | 121.6(6) | C8               | C13  | C12  | 119.7(7)  |
| N2   | C2   | C3   | 128.8(6) | O1               | C14  | C15  | 107.4(7)  |
| C1   | C2   | N2   | 110.7(5) | O1               | C14  | C15A | 105.1(10) |
| C1   | C2   | C3   | 120.6(6) | C15A             | C14  | C15  | 34.1(8)   |
| C4   | C3   | C2   | 117.0(6) | O2               | C15  | C14  | 105.8(8)  |
| C5   | C4   | C3   | 120.7(6) | O2               | C16  | O2A  | 31.6(6)   |
| C6   | C5   | C4   | 122.8(6) | C16 <sup>1</sup> | C16  | O2   | 106.0(6)  |
| C5   | C6   | C1   | 117.3(6) | C16 <sup>1</sup> | C16  | O2A  | 125.7(10) |
| N1   | C7   | C8   | 122.9(6) | C11              | C17  | Cl2  | 110.4(4)  |
| N2   | C7   | N1   | 112.2(6) | C11              | C17  | Cl3  | 110.1(3)  |
| N2   | C7   | C8   | 124.9(6) | Cl2              | C17  | Cl3  | 109.1(3)  |
| C9   | C8   | C7   | 125.0(6) | C15A             | O2A  | C16  | 104.2(18) |
| C13  | C8   | C7   | 117.8(6) | O2A              | C15A | C14  | 107.4(17) |
| C13  | C8   | C9   | 117.2(6) |                  |      |      |           |



**Table S6.** Hydrogen Atom Coordinates ( $\text{\AA}\times 10^4$ ) and Isotropic Displacement Parameters ( $\text{\AA}^2\times 10^3$ ) for BBI-3 $\cdot$ CHCl<sub>3</sub>.

| Atom | x    | y    | z     | U(eq) |
|------|------|------|-------|-------|
| H1   | 6499 | 6813 | -134  | 61    |
| H3   | 5415 | 6989 | 761   | 85    |
| H4   | 5727 | 7462 | 1088  | 81    |
| H5   | 6302 | 7666 | 893   | 82    |
| H6   | 6609 | 7395 | 403   | 78    |
| H10  | 6507 | 5901 | -1036 | 82    |
| H11  | 5974 | 5577 | -1146 | 97    |
| H12  | 5460 | 5672 | -777  | 114   |
| H13  | 5486 | 6091 | -273  | 91    |
| H14A | 6927 | 6324 | -988  | 96    |
| H14B | 7086 | 6143 | -620  | 96    |
| H14C | 6969 | 6475 | -971  | 96    |
| H14D | 7013 | 6098 | -746  | 96    |
| H15A | 7457 | 6677 | -779  | 74    |
| H15B | 7098 | 6932 | -763  | 74    |
| H16A | 7689 | 7085 | -338  | 120   |
| H16B | 7311 | 7297 | -260  | 120   |
| H16C | 7681 | 6980 | -315  | 120   |
| H16D | 7446 | 7341 | -267  | 120   |
| H17  | 8525 | 4723 | -122  | 78    |
| H15C | 7289 | 6387 | -266  | 74    |
| H15D | 7480 | 6563 | -621  | 74    |

**Table S7.** Summary of the reported adsorption capacity of iodine adsorbents

| Porous materials              | Temperature (□) | Iodine uptake (g/g) | References       |
|-------------------------------|-----------------|---------------------|------------------|
| BisImi-POP@2                  | 75              | 10.30               | S1               |
| BisImi-POP@1                  | 75              | 9.50                | S1               |
| BisImi POP@4                  | 75              | 6.45                | S1               |
| QTD-COF-V                     | 75              | 6.29                | S2               |
| QTD-COF-3                     | 75              | 5.16                | S2               |
| QTD-COF-4                     | 75              | 4.85                | S2               |
| BisImi-POP@3                  | 75              | 4.83                | S1               |
| QTD-COF-1                     | 75              | 4.67                | S2               |
| <b>BTM</b>                    | <b>75</b>       | <b>4.46</b>         | <b>This Work</b> |
| BisImi-POP@6                  | 75              | 3.93                | S1               |
| COP <sub>1</sub> <sup>0</sup> | 60              | 3.80                | S3               |
| KOH-AC                        | 77              | 3.76                | S4               |
| HCMP-3                        | 85              | 3.36                | S5               |
| HCMP-2                        | 85              | 3.16                | S5               |
| AzoPPN                        | 77              | 2.90                | S6               |
| PAF-24                        | 75              | 2.76                | S7               |
| PAF-23                        | 75              | 2.71                | S7               |
| PAF-25                        | 75              | 2.60                | S7               |
| Azo-Trip                      | 77              | 2.38                | S8               |
| MOF-808                       | 80              | 2.18                | S9               |
| NOP-54                        |                 | 2.02                | S10              |
| Cu-BTC                        | 75              | 1.75                | S11              |
| ZIF-8                         | 75              | 1.20                | S12              |
| ThSINAP-8                     | 80              | 0.473               | S13              |
| JLUE-BM-SOF-3-DMSO            | 25              | 0.207               | S14              |

**References:**

1. T. H. Niu, C. C. Feng, C. Yao, W. Y. Yang and Y. H. Xu, *ACS Appl. Polym. Mater.*, 2020, **3**, 354–361.
2. X. Guo, Y. Li, M. Zhang, K. Cao, Y. Tian, Y. Qi, S. Li, K. Li, X. Yu and L. Ma, *Angew. Chem.*, 2020, **132**, 22886–22894.
3. A. Trabolsi, G. Das, T. Prakasham, S. Nuryyeva and F. Ravoux, *J. Mater. Chem. A*, 2016, **4**, 15361–15369.

4. H. Sun, P. La, Z. Zhu, W. Liang, B. Yang and A. Li, *J. Mater. Sci.*, 2015, **50**, 7326–7332.
5. Y. Liao, J. Weber, B. M. Mills, Z. Ren and C. F. J. Faul, *Macromol.*, 2016, **49**, 6322–6333.
6. H. Li, X. Ding and B.-H. Han, *Chem. - Eur. J.*, 2016, **22**, 11863–11868.
7. Z. Yan, Y. Yuan, Y. Tian, D. Zhang and G. Zhu, *Angew. Chem.*, 2015, **54**, 14215–14215.
8. Q. Q. Dang, X. M. Wang, Y. F. Zhan and X. M. Zhang, *Polym. Chem.*, 2016, **7**, 643–647.
9. P. Chen, X. He, M. Pang, X. Dong, S. Zhao and W. Zhang, *ACS Appl. Mater. Interfaces*, 2020, **12**, 20429–20439.
10. D. Chen, Y. Fu, W. Yu, G. Yu and C. Pan, *Chem. Eng. J.*, 2018, **334**, 900–906.
11. D. F. Sava, K. W. Chapman, M. A. Rodriguez, J. A. Greathouse, P. S. Crozier, H. Zhao, P. J. Chupas and T. M. Nenoff, *Chem. Mater.*, 2013, **25**, 2591–2596.
12. J. T. Hughes, D. F. Sava, T. M. Nenoff and A. Navrotsky, *J. Am. Chem. Soc.*, 2013, **135**, 16256–16259.
13. Z. J. Li, Z. Yue, Y. Ju, X. Wu and J. Q. Wang, *Inorg. Chem.*, 2020, **59**, 4435–4442.
14. Y. Li, H. Yu, F. Xu, Q. Guo, Z. Xie and Z. Sun, *CrystEngComm*, 2019, **21**, 1742–1749.
